# Supplementary material
Source: HighWire-hosted journal article supplement (https://genome.cshlp.org/content/suppl/2000/05/10/10.4.483)

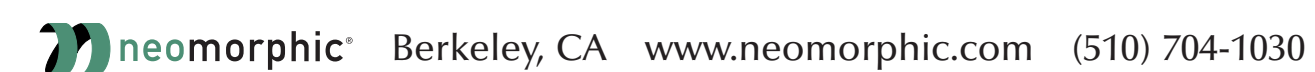

Supplement: GR10n4_poster.zip [file GR10n4_poster.pdf › GR10n4_poster.pdf]
